# Supplementary material for: Hippocampal metabolism of amino acids by L-amino acid oxidase is involved in fear learning and memory
Source: PubMed Central journal article supplement (PMC6056520; doi:10.1038/s41598-018-28885-x), 2018-07-23
Supplement: 41598_2018_28885_MOESM1_ESM.pdf [file 41598_2018_28885_MOESM1_ESM.pdf]

## Supplementary information

Hippocampal metabolism of amino acids by L-amino acid oxidase is involved in fear learning and memory

Kento Usuda, Takahiro Kawase, Yuko Shigeno, Susumu Fukuzawa, Kazuki Fujii, Haolin Zhang, Takamitsu Tsukahara, Shozo Tomonaga, Gen Watanabe, Wanzhu Jin & Kentaro Nagaoka

### Content

**Figure S1.** Hot plate test.

**Figure S2.** Original gel image in Fig. 5

**Table S1.** The result of measurement of 19 L-amino acids in plasma.

**Table S2.** The list of metabolites that showed significant difference between WT and LAO KO hippocampus.

**Table S3.** Multiple reaction monitoring transitions and individual parameters for the neurotransmitters analysis by LC-MS/MS.

**Table S4.** The list of primers.

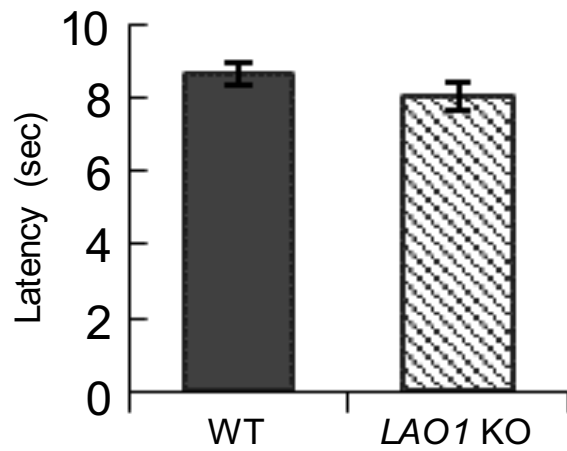

**Figure S1. Hot plate test.** Mice (male WT mice: n=8, male LAO1 KO mice: n=8) were placed on a hot plate preheated to 55° C until the mice manifested a nociceptive behaviour

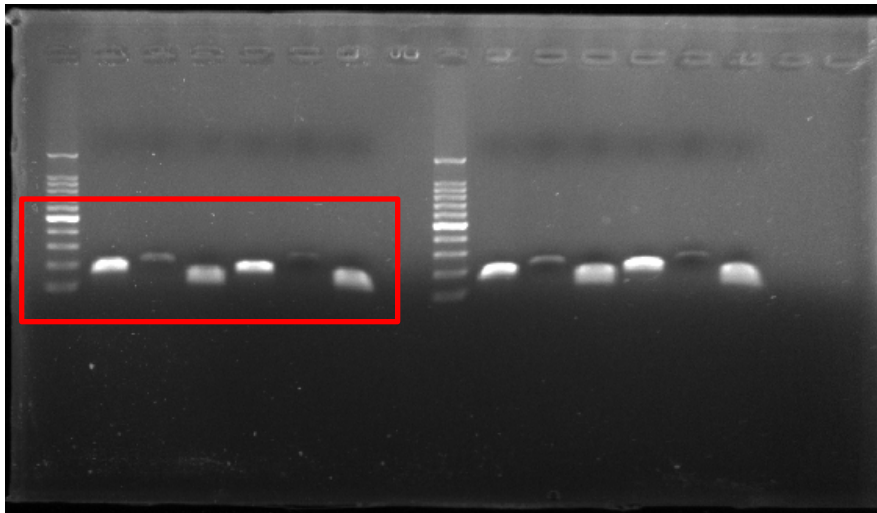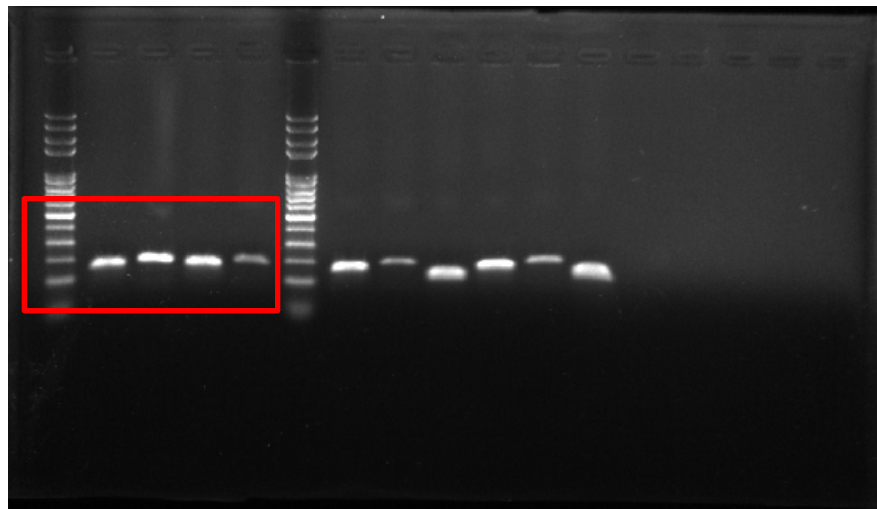

Figure S2. Original gel image in Fig. 5.

|               | WT            | LAO KO        | p value  |
|---------------|---------------|---------------|----------|
| Alanine       | 39.23 ± 3.03  | 50.21 ± 2.34  | p < 0.05 |
| Glycine       | 41.05 ± 2.41  | 48.93 ± 2.84  | N.S      |
| Valine        | 31.04 ± 2.28  | 39.58 ± 2.75  | p < 0.05 |
| Leucine       | 21.79 ± 1.91  | 28.27 ± 2.19  | N.S      |
| Isoleucine    | 12.17 ± 1.02  | 14.68 ± 1.10  | N.S      |
| Threonine     | 20.59 ± 2.35  | 26.39 ± 2.27  | N.S      |
| Serine        | 14.15 ± 1.27  | 19.03 ± 2.00  | N.S      |
| Proline       | 16.56 ± 1.21  | 22.33 ± 1.78  | p < 0.05 |
| Asparagine    | 5.76 ± 0.80   | 10.10 ± 1.48  | p < 0.05 |
| Aspartic acid | 2.89 ± 0.28   | 4.01 ± 0.44   | N.S      |
| Methionine    | 8.76 ± 0.60   | 11.08 ± 0.86  | N.S      |
| Glutamic acid | 10.04 ± 0.80  | 11.88 ± 0.88  | N.S      |
| Phenylalanine | 9.15 ± 0.74   | 14.45 ± 1.75  | p < 0.05 |
| Glutamine     | 39.53 ± 3.34  | 57.57 ± 8.00  | N.S      |
| Ornithine     | 11.44 ± 0.90  | 16.66 ± 1.88  | p < 0.05 |
| Lysine        | 28.19 ± 2.84  | 34.97 ± 2.82  | N.S      |
| Histidine     | 8.36 ± 0.12   | 9.55 ± 0.65   | N.S      |
| Tyrosine      | 9.61 ± 0.78   | 13.23 ± 2.23  | N.S      |
| Tryptophan    | 4.97 ± 0.31   | 4.91 ± 0.52   | N.S      |
| LNAA          | 105.84 ± 7.13 | 135.75 ± 8.75 | p < 0.05 |
| Phe/LNAA      | 0.086 ± 0.016 | 0.106 ± 0.008 | N.S      |
| Tyr/LNAA      | 0.091 ± 0.006 | 0.095 ± 0.012 | N.S      |
| Trp/LNAA      | 0.047 ± 0.002 | 0.036 ± 0.004 | p < 0.05 |

**Table S1. The result of measurement of 19 L-amino acids in plasma.**

Data are presented as means (nmol / L) ± S.E.M. p < 0.05, unpaired t-test.

N.S: no significant difference.

|                               | WT       | LAO KO         |
|-------------------------------|----------|----------------|
| Mannitol                      | 1 ± 0.18 | 1.73 ± 0.19    |
| Arabitol                      | 1 ± 0.16 | 1.62 ± 0.20    |
| Malic acid                    | 1 ± 0.13 | 1.99 ± 0.26    |
| Isocitric acid&Citric acid    | 1 ± 0.15 | 2.01 ± 0.29    |
| 5-Hydroxyindoleacetic acid    | 1 ± 0.11 | 2.04 ± 0.14    |
| Erythritol                    | 1 ± 0.15 | 1.95 ± 0.13    |
| Uracil                        | 1 ± 0.18 | 2.12 ± 0.21    |
| Niacinamide                   | 1 ± 0.16 | 1.74 ± 0.11    |
| Lyxose                        | 1 ± 0.17 | 1.78 ± 0.17    |
| Fumaric acid                  | 1 ± 0.17 | 1.71 ± 0.23    |
| (+/-)-erythro-Isoleucine      | 1 ± 0.16 | 2.03 ± 0.20    |
| N-Acetylglutamic acid         | 1 ± 0.13 | 1.92 ± 0.22    |
| Beta-Alanine                  | 1 ± 0.23 | 2.01 ± 0.24    |
| O-Phosphoethanolamine         | 1 ± 0.17 | 2.14 ± 0.31    |
| Adenine                       | 1 ± 0.14 | 1.94 ± 0.22    |
| Glycine                       | 1 ± 0.19 | 2.04 ± 0.28    |
| Indoxyl sulfate               | 1 ± 0.32 | 2.30 ± 0.28    |
| Galactitol                    | 1 ± 0.15 | 2.13 ± 0.44    |
| Dopamine                      | 1 ± 0.18 | 2.13 ± 0.28    |
| Hypotaurine                   | 1 ± 0.16 | 2.00 ± 0.26    |
| Acetoacetic acid              | 1 ± 0.41 | 0.02 ± 0.005   |
| Alpha-ketoisovaleric acid     | 1 ± 0.41 | 0.004 ± 0.0007 |
| Phenylpyruvic acid            | 1 ± 0.09 | 0.05 ± 0.013   |
| Sarcosine                     | 1 ± 0.16 | 2.00 ± 0.26    |
| 2-Aminoisobutyric acid        | 1 ± 0.16 | 2.00 ± 0.26    |
| Phenylalanine                 | 1 ± 0.17 | 3.12 ± 0.64    |
| Cadaverine                    | 1 ± 0.31 | 3.91 ± 1.18    |
| 3-Hydroxybutyric acid         | 1 ± 0.17 | 2.62 ± 0.59    |
| 5-Sulfosalicylic acid         | 1 ± 0.16 | 2.35 ± 0.53    |
| threo-3-Hydroxy-aspartic acid | 1 ± 0.16 | 2.35 ± 0.53    |
| N-Formyl-L-methionine         | 1 ± 0.16 | 2.35 ± 0.53    |
| 2-Methyl-1-propylamine        | 1 ± 0.16 | 2.55 ± 0.48    |
| Deoxyguanosine                | 1 ± 0.16 | 2.55 ± 0.48    |
| Pelargonic acid               | 1 ± 0.27 | 2.49 ± 0.42    |
| Homoserine                    | 1 ± 0.17 | 1.76 ± 0.21    |
| Serine                        | 1 ± 0.17 | 1.62 ± 0.20    |
| Methionine sulfone            | 1 ± 0.99 | 6.57 ± 1.76    |
| N-Acetyl-b-D-galactosamine    | 1 ± 0.36 | 2.18 ± 0.20    |
| Glutamic acid                 | 1 ± 0.29 | 2.02 ± 0.14    |
| Allantoin                     | 1 ± 0.37 | 2.02 ± 0.19    |
| Tyrosine                      | 1 ± 0.16 | 2.49 ± 0.55    |

**Table S2. The list of metabolites that showed significant difference between WT and LAO KO hippocampus.**

| Analytes                                                             | m / z         | Cone voltage (V) | Collision Energy (V) |
|----------------------------------------------------------------------|---------------|------------------|----------------------|
| Tyrosine <sup>13</sup> C <sub>9</sub> , <sup>15</sup> N <sub>1</sub> | 192.3 > 145.2 | 25               | 18                   |
| Acetylcholine                                                        | 146.0 > 87.2  | 25               | 18                   |
| Serotonin                                                            | 177.1 > 160.2 | 18               | 18                   |
| Dopamine                                                             | 154.0 > 137.2 | 24               | 18                   |

**Table S3. Multiple reaction monitoring transitions and individual parameters for the neurotransmitters analysis by LC-MS/MS.**

| Primer                  | Sequence 5' to 3'        |
|-------------------------|--------------------------|
| PK Forward              | ggtgtttgcacatcttca tcc   |
| PK Reverse              | ccttctctgcagga atctca    |
| Pah Forward             | ccaccaggettta aag atcc   |
| Pah Reverse             | cagagtcctgaaca ccg ttcc  |
| Bpgm Forward            | taatttatcgtggc cca gacg  |
| Bpgm Reverse            | acgggaggagcaga aaa gt tc |
| Ddc Forward             | caggcttacatccg aaa gc ac |
| Ddc Reverse             | agcagaccaacca aga at ga  |
| Chrm1 Forward           | accagcatcaggac cgg aaa   |
| Chrm1 Reverse           | tttgccgatccct ctgaca     |
| AchE Forward            | cactcctcttctcctcctc      |
| AchE Reverse            | gtggtagcatccaacac tc c   |
| LAO1 Forward            | tggccaagaagagt gga atc   |
| LAO1 Reverse            | agctcccactaccacca ca c   |
| $\beta$ -Tublin Forward | gctgaccagtgcac gc        |
| $\beta$ -Tublin Reverse | aaacctggggggct ggg t     |
| Dsp Forward             | gctgaagaacactc tagccca   |
| Dsp Reverse             | actgctgtttcctc tga gaca  |

**Table S4. The list of primers.**

*PK: Pyruvate kinase, Pah: Phenylalanine hydroxylase, Bpgm: 2,3-bisphosphoglycrate mutase, Ddc: Aromatic L-amino acid decarboxylase, Chrm1: muscarinic M1 Ach receptor, AchE: Acetylcholine esterase, Dsp:desmoplakin*
